# Supplementary material
Source: Copernicus journal article supplement (doi:10.5194/acp-26-9207-2026)
Supplement: Supplementary file 1 [file acp-26-9207-2026-supplement.pdf]

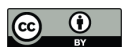

*Supplement of*

## **El Niño meets elevated Tibetan Plateau snow cover: independent and synergistic effects on the winter PM<sub>2.5</sub> dipole pattern in China**

**Xiaorui Zhang et al.**

*Correspondence to:* Meng Gao (mmgao2@hkbu.edu.hk)

The copyright of individual parts of the supplement might differ from the article licence.

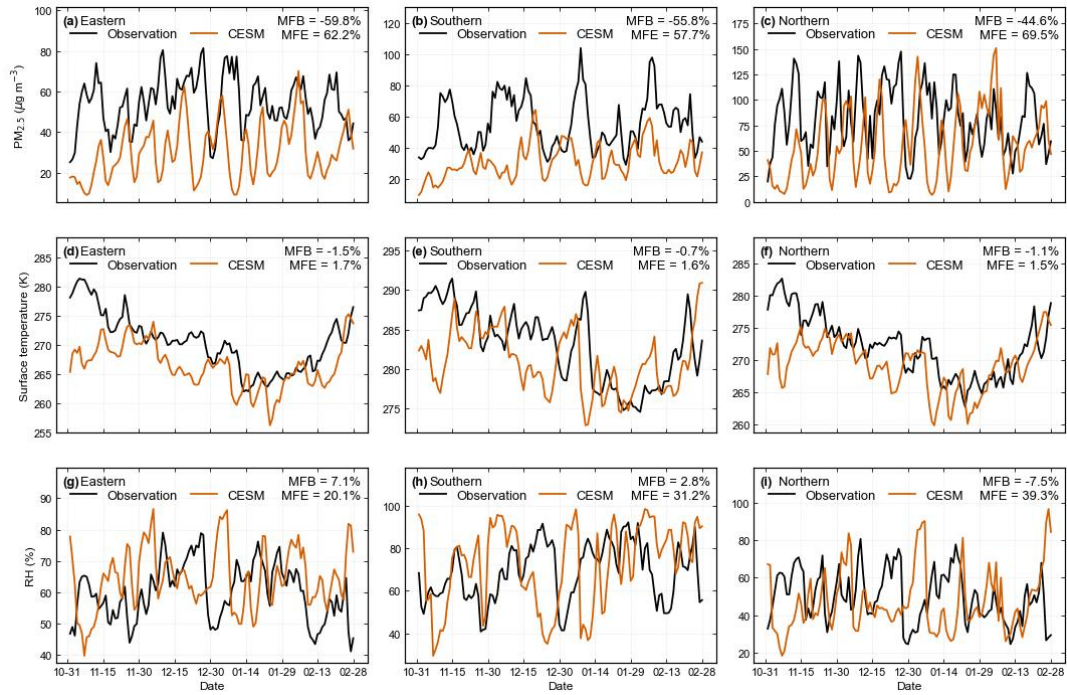

**Figure S1.** Model evaluation of the CESM<sub>ctrl</sub>. Simulated and observed daily (a-c) surface PM<sub>2.5</sub> concentration ( $\mu\text{g m}^{-3}$ ), (d-f) surface air temperature (K), (g-i) relative humidity (%) over eastern China ( $110^{\circ}$ - $135^{\circ}\text{E}$ ,  $15^{\circ}$ - $50^{\circ}\text{N}$ ), southern China ( $110^{\circ}$ - $135^{\circ}\text{E}$ ,  $15^{\circ}$ - $30^{\circ}\text{N}$ ) and northern China ( $110^{\circ}$ - $135^{\circ}\text{E}$ ,  $35^{\circ}$ - $50^{\circ}\text{N}$ ), during November 2010 to February 2011. The mean fractional biases (MFBs) and the mean fractional errors (MFEs) of all simulations meet the model performance criteria of within  $\pm 0.6$  for MFB and less than  $+ 0.75$  for MFE.

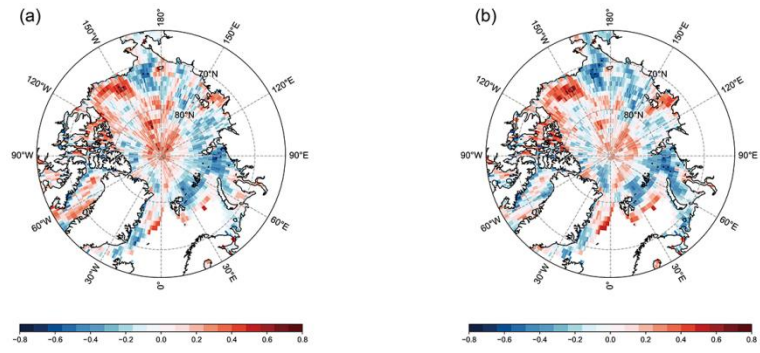

**Figure S2.** (a) Correlation and (b) partial correlation patterns of PC2 with Arctic sea ice, with the influence of Niño 1+2 removed. Dotted areas represent statistical significance with 95% confidence according to Student's *t* test.

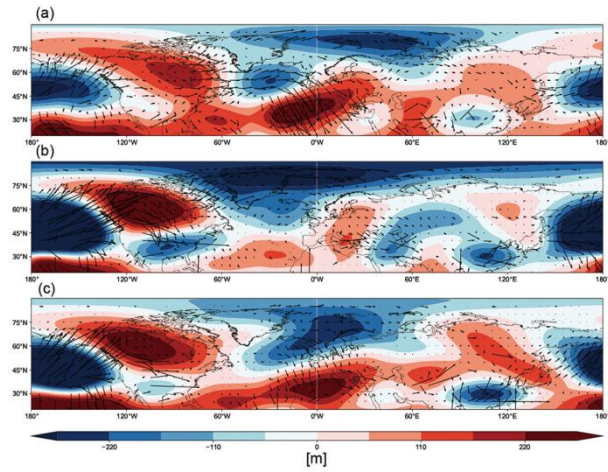

**Figure S3.** Regression of geopotential height (m) and corresponding wave activity flux (vectors) at 200 hPa during winter from 2005 to 2021 on (a) PC2, (b) Niño 1+2 and (c) Niño 3.4.

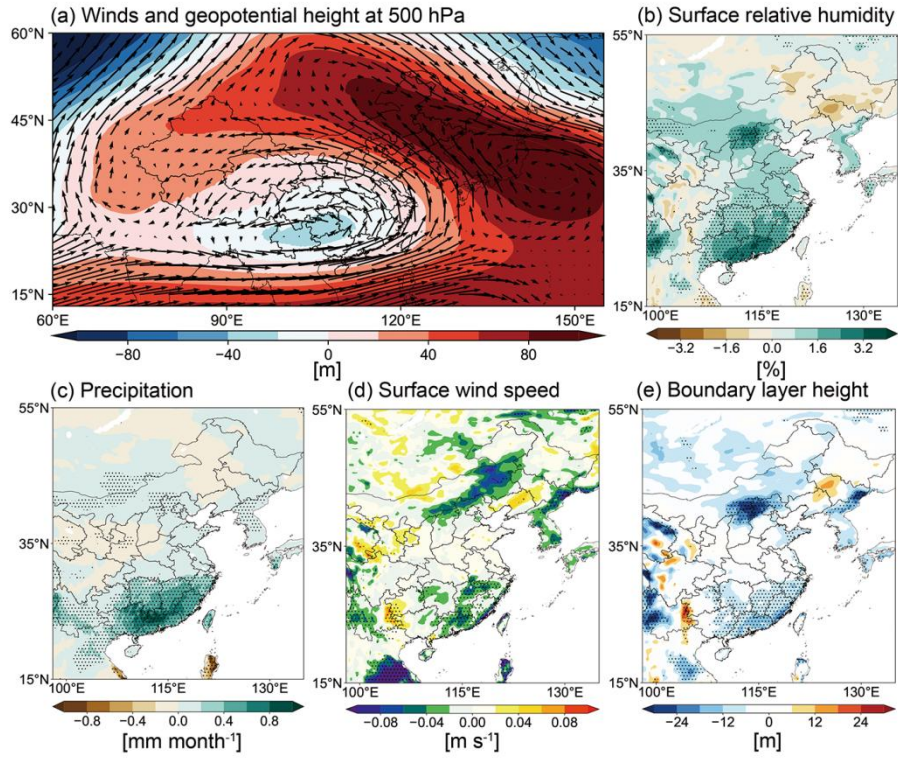

**Figure S4.** Anomalies for (a) geopotential height (m, shading) and wind fields ( $\text{m s}^{-1}$ , vector) at 500 hPa, (b) relative humidity at 1000 hPa (%), (c) total precipitation ( $\text{mm month}^{-1}$ ), (d) surface wind speed ( $\text{m s}^{-1}$ ), and (e) planetary boundary layer height (m) during winter over 1979-2021 obtained by regression upon normalized Niño 3.4 index. Dotted areas represent statistical significance with 95% confidence according to Student's *t* test.

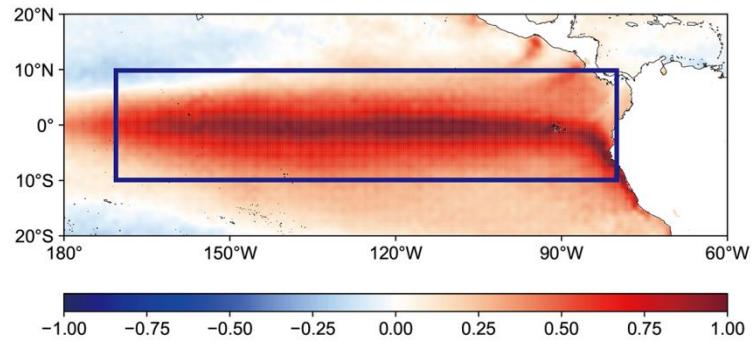

**Figure S5.** Composite difference of winter averaged sea surface temperature (K) between positive Niño 1+2 years and climatological mean over 1979-2021 (The blue box represent the region with sea surface temperature anomaly imposed in Community Earth System Model).

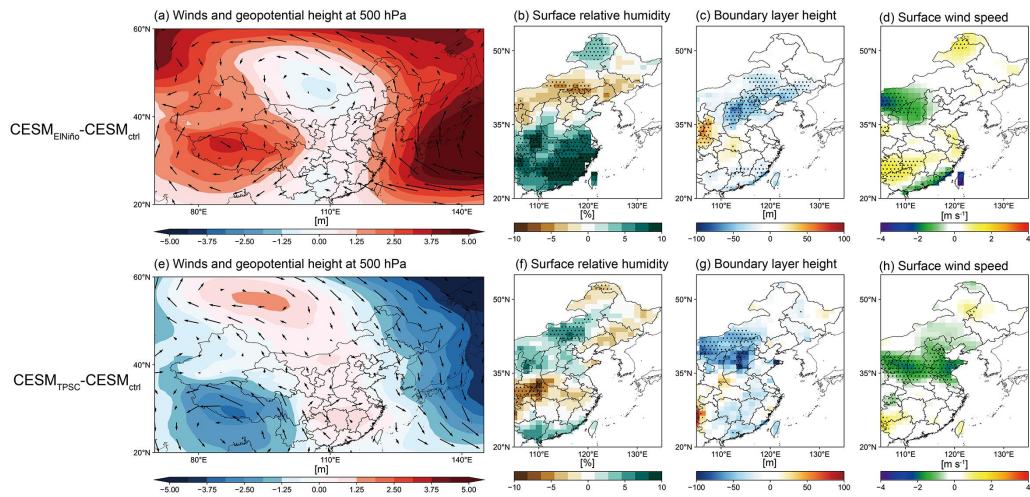

**Figure S6.** CESM simulated responses of (a, e) geopotential height (m, contour) and wind fields ( $\text{m s}^{-1}$ , vector) at 500 hPa, (b, f) surface relative humidity (%), (c, g) planetary boundary layer height (m) and (d, h) surface wind speed ( $\text{m s}^{-1}$ ) during winter to Niño 1+2, and higher albedo forcing over the northern TP. Dotted areas indicate responses that are significant at the 95% confidence level based on a two-tailed Student's *t* test applied to daily simulated anomalies during the winter period.

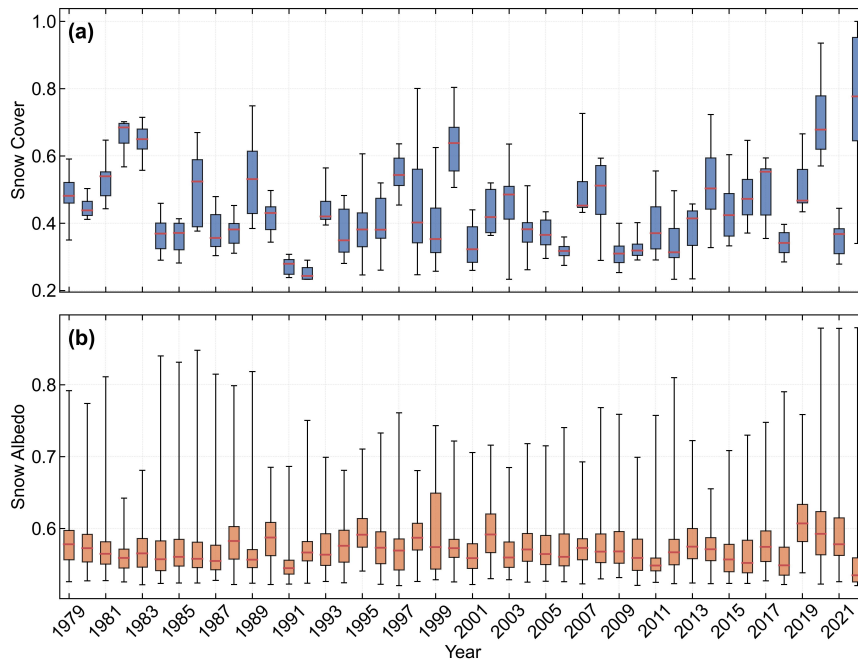

**Figure S7.** Interannual variations in winter (a) snow cover extent and (b) snow albedo over the northern Tibetan Plateau (86°-94°E, 35°-40°N) during 1979-2021. In each boxplot, the central red line denotes the median value, the box boundaries indicate the interquartile range (25th-75th percentiles), and the whiskers represent the minimum and maximum values.
